# Supplementary material
Source: HighWire-hosted journal article supplement (https://cmaj.ca/highwire/filestream/81281/field_highwire_adjunct_files/1/211881-res-2-at.pdf)
Supplement: 211881-res-2-at.pdf [file 211881-res-2-at.pdf]

**Supplementary Appendix 2:** Relative ratios, seroconversion and proportion attaining the median convalescent serum level after BNT162b2 or mRNA-1273 vaccination in patients with serology at both 6-7 weeks and 12 weeks

| Antibody   | Weeks after second dose | Relative ratio, median (IQR) |                    |         | No. (%) of patients with seroconversion |                 |         | No. (%) of patients who reached convalescent level |                 |         |
|------------|-------------------------|------------------------------|--------------------|---------|-----------------------------------------|-----------------|---------|----------------------------------------------------|-----------------|---------|
|            |                         | BNT162b2                     | mRNA-1273          | p-value | BNT162b2                                | mRNA-1273       | p-value | BNT162b2                                           | mRNA-1273       | p-value |
| Anti-spike | 6-7                     | 1.58 (1.39-1.68)             | 1.73 (1.69-1.79)   | <0.001  | 60 (87)<br>n=63                         | 61 (97)<br>n=63 | 1.00    | 48 (76)<br>n=63                                    | 60 (95)<br>n=63 | <0.001  |
|            | 12                      | 1.35 (0.86-1.52)             | 1.97 (1.75-2.05)   | <0.001  | 61 (97)<br>n=63                         | 60 (95)<br>n=63 |         | 28 (44)<br>n=63                                    | 60 (95)<br>n=63 |         |
| Anti-RBD   | 6-7                     | 1.33 (0.71-1.64)             | 1.44 (1.29-1.52)   | 0.39    | 58 (92)<br>n=63                         | 60 (95)<br>n=63 | 0.031   | 33 (52)<br>n=63                                    | 50 (79)<br>n=63 | <0.001  |
|            | 12                      | 0.75 (0.28-1.34)             | 1.30 (1.04-1.46)   | <0.001  | 53 (84)<br>n=63                         | 59 (94)<br>n=63 |         | 20 (32)<br>n=63                                    | 39 (62)<br>n=63 |         |
| Anti-NP    | 6-7                     | 0.055 (0.030-0.11)           | 0.060 (0.043-0.13) | 0.24    | 11 (18)<br>n=63                         | 6 (10)<br>n=63  | 0.38    | 3 (5)<br>n=63                                      | 6 (10)<br>n=63  | 0.69    |
|            | 12                      | 0.040 (0.020-0.090)          | 0.057 (0.035-0.11) | 0.03    | 10 (16%)<br>n=63                        | 4 (6%)<br>n=63  |         | 5 (8)<br>n=63                                      | 2 (3)<br>n=63   |         |

Note: IQR=interquartile range, NP=nucleocapsid protein, RBD=receptor binding domain.

Note: Mann-Whitney test was used to compare antibody relative ratios at 6-7 weeks and 12 weeks while McNemar's test was used for comparison of proportions with seroconversion and reaching convalescent levels at 6-7 weeks and 12 weeks.
